# Supplementary material
Source: PubMed Central journal article supplement (PMC3816537)
Supplement: NIHMS520763-supplement-supp_data_5.pdf [file NIHMS520763-supplement-supp_data_5.pdf]

## Supplemental Table 2

| probeID      | geneSymbol                                                      | geneTitle                                                                                                                                                                                                                                                                    | cox.it       |
|--------------|-----------------------------------------------------------------|------------------------------------------------------------------------------------------------------------------------------------------------------------------------------------------------------------------------------------------------------------------------------|--------------|
| 223518_at    | DFFA                                                            | DNA fragmentation factor, 45kDa, alpha polypeptide                                                                                                                                                                                                                           | 4.86807974   |
| 212370_x_at  | FAM21A /// FAM21B /// FAM21C                                    | family with sequence similarity 21, member A /// family with sequence similarity 21, member B /// family with sequence similarity 21, member C                                                                                                                               | -4.039911936 |
| 228937_at    | C13orf51                                                        | chromosome 13 open reading frame 31                                                                                                                                                                                                                                          | -3.965652752 |
| 224217_s_at  | FAP1                                                            | Fas (TNFRSF6) associated factor 1                                                                                                                                                                                                                                            | 3.818892986  |
| 219066_at    | PPDC                                                            | phosphoguanthioethylethylcysteine decarboxylase                                                                                                                                                                                                                              | -3.812463041 |
| 200994_at    | IPQ7                                                            | importin 7                                                                                                                                                                                                                                                                   | 3.722967297  |
| 203853_s_at  | GAB2                                                            | GRB2-associated binding protein 2                                                                                                                                                                                                                                            | -3.576924648 |
| 218118_s_at  | TIMM23                                                          | translocase of inner mitochondrial membrane 23 homolog (yeast)                                                                                                                                                                                                               | -3.525051556 |
| 238662_at    | ATPB04                                                          | ATP binding domain 4                                                                                                                                                                                                                                                         | 3.522716521  |
| 212905_at    | CSTF2                                                           | cleavage stimulation factor, 3' pre-RNA, subunit 2, 64kDa, tau variant                                                                                                                                                                                                       | -3.458703211 |
| 225075_at    | PDRG1                                                           | p53 and DNA-damage regulated 1                                                                                                                                                                                                                                               | 3.437886045  |
| 211430_s_at  | IGH@ /// IGHG1 /// IGHG2 /// IGHM /// IGHV4-31 /// LOC100294459 | immunoglobulin heavy locus /// immunoglobulin heavy constant gamma 1 (G1m marker) /// immunoglobulin heavy constant gamma 2 (G2m marker) /// immunoglobulin heavy constant mu /// immunoglobulin heavy variable 4-31 /// similar to immunoglobulin lambda-like polypeptide 1 | -3.404297079 |
| 244181_at    | 244181_at                                                       | ---                                                                                                                                                                                                                                                                          | -3.363118529 |
| 202231_at    | EIF3M                                                           | eukaryotic translation initiation factor 3, subunit M                                                                                                                                                                                                                        | 3.345657723  |
| 201160_s_at  | CSDA                                                            | cold shock domain protein A                                                                                                                                                                                                                                                  | 3.337512802  |
| 214946_x_at  | FAM21A /// FAM21B /// FAM21C /// FAM21D                         | family with sequence similarity 21, member A /// family with sequence similarity 21, member B /// family with sequence similarity 21, member C /// family with sequence similarity 21, member D                                                                              | -3.324283023 |
| 228031_at    | TPPAL                                                           | tocopherol (alpha) transfer protein-like                                                                                                                                                                                                                                     | 3.318341721  |
| 49485_at     | PRM4                                                            | PR domain containing 4                                                                                                                                                                                                                                                       | -3.296678889 |
| 202772_at    | HMCL                                                            | 3-hydroxyethyl-3-methylglutaryl-Coenzyme A lyase                                                                                                                                                                                                                             | 3.289817866  |
| 214263_x_at  | POLR2C                                                          | polymerase (RNA) II (DNA directed) polypeptide C, 33kDa                                                                                                                                                                                                                      | 3.247645405  |
| 204588_s_at  | SLC7A7                                                          | solute carrier family 7 (cationic amino acid transporter, y+ system), member 7                                                                                                                                                                                               | -3.246799284 |
| 201460_at    | MAPKAP2                                                         | mitogen-activated protein kinase-activated protein kinase 2                                                                                                                                                                                                                  | -3.217558043 |
| 211816_s_at  | PHF11                                                           | PHD finger protein 11                                                                                                                                                                                                                                                        | -3.210211952 |
| 224765_at    | MSL1                                                            | male-specific lethal 1 homolog (Drosophila)                                                                                                                                                                                                                                  | -3.201349163 |
| 200079_s_at  | KARS                                                            | lysyl-tRNA synthetase                                                                                                                                                                                                                                                        | 3.176831828  |
| 207540_s_at  | SYK                                                             | spleen tyrosine kinase                                                                                                                                                                                                                                                       | -3.167762487 |
| 211068_x_at  | FAM21C /// FAM21D                                               | family with sequence similarity 21, member C /// family with sequence similarity 21, member D                                                                                                                                                                                | -3.163139857 |
| 219221_at    | ZBTB38                                                          | zinc finger and BTB domain containing 38                                                                                                                                                                                                                                     | -3.154409272 |
| 219108_x_at  | DDX27 /// SS18                                                  | DEAD (Asp-Glu-Ala-Asp) box polypeptide 27 /// synovial sarcoma translocation, chromosome 18                                                                                                                                                                                  | 3.152293026  |
| 204321_at    | NEO1                                                            | neogenin homolog 1 (chicken)                                                                                                                                                                                                                                                 | -3.12510147  |
| 208877_at    | PAK2                                                            | p21 protein [Cdc42/Rac]-activated kinase 2                                                                                                                                                                                                                                   | -3.114509537 |
| 217830_x_at  | LARS                                                            | leucyl-tRNA synthetase                                                                                                                                                                                                                                                       | 3.112234576  |
| 203824_at    | TPSAB8                                                          | tetraspanin 8                                                                                                                                                                                                                                                                | -3.101921477 |
| 209250_at    | DEGS1                                                           | degenerative spermatocyte homolog 1, lipid desaturase (Drosophila)                                                                                                                                                                                                           | -3.094524615 |
| 226155_at    | FAM160B1                                                        | family with sequence similarity 160, member B1                                                                                                                                                                                                                               | -3.083172474 |
| 200840_at    | KARS                                                            | lysyl-tRNA synthetase                                                                                                                                                                                                                                                        | 3.076542431  |
| 219324_at    | NOL12 /// TRIOBP                                                | nucleolar protein 12 /// TRIO and F-actin binding protein                                                                                                                                                                                                                    | 3.065288991  |
| 222240_s_at  | ISYNA1                                                          | inositol-3-phosphate synthase 1                                                                                                                                                                                                                                              | 3.05735827   |
| 218329_at    | PRM4                                                            | PR domain containing 4                                                                                                                                                                                                                                                       | -3.057231245 |
| 230192_at    | TRIM13                                                          | triglycine motif-containing 13                                                                                                                                                                                                                                               | -3.050686869 |
| 208486_x_at  | CFLAR                                                           | CASP8 and FADD-like apoptosis regulator                                                                                                                                                                                                                                      | -3.048629384 |
| 215719_x_at  | FAS                                                             | Fas (TNF receptor superfamily, member 6)                                                                                                                                                                                                                                     | -3.046347717 |
| 225401_at    | C1orf85                                                         | chromosome 1 open reading frame 85                                                                                                                                                                                                                                           | -3.043214019 |
| 243179_at    | LOC100130360                                                    | Hypothetical protein LOC100130360                                                                                                                                                                                                                                            | -3.037350457 |
| 218080_x_at  | FAP1                                                            | Fas (TNFRSF6) associated factor 1                                                                                                                                                                                                                                            | 3.035637328  |
| 212929_s_at  | FAM21A /// FAM21B /// FAM21C /// FAM21D                         | family with sequence similarity 21, member A /// family with sequence similarity 21, member B /// family with sequence similarity 21, member C /// family with sequence similarity 21, member D                                                                              | -3.030701488 |
| 226354_at    | LACTB                                                           | lactamase, beta                                                                                                                                                                                                                                                              | -3.02915401  |
| 200884_at    | CKB                                                             | creatine kinase, brain                                                                                                                                                                                                                                                       | 3.024029876  |
| 227541_at    | WDK20                                                           | WD repeat domain 20                                                                                                                                                                                                                                                          | 3.017019572  |
| 225050_at    | PCYT1A                                                          | Phosphate cytidylyltransferase 1, choline, alpha                                                                                                                                                                                                                             | -2.99564384  |
| 224795_x_at  | IGK@ /// IGKC                                                   | immunoglobulin kappa locus /// immunoglobulin kappa constant                                                                                                                                                                                                                 | -2.98246126  |
| 221651_x_at  | IGK@ /// IGKC                                                   | immunoglobulin kappa locus /// immunoglobulin kappa constant                                                                                                                                                                                                                 | -2.981592545 |
| 224502_s_at  | KIAA1191                                                        | KIAA1191                                                                                                                                                                                                                                                                     | 2.976832775  |
| 211317_s_at  | CFLAR                                                           | CASP8 and FADD-like apoptosis regulator                                                                                                                                                                                                                                      | -2.97292998  |
| 227111_at    | ZBTB34                                                          | zinc finger and BTB domain containing 34                                                                                                                                                                                                                                     | -2.970088311 |
| 227609_at    | EPST11                                                          | epithelial stromal interaction 1 (breast)                                                                                                                                                                                                                                    | -2.964417692 |
| 216993_x_at  | DDX27                                                           | DEAD (Asp-Glu-Ala-Asp) box polypeptide 27                                                                                                                                                                                                                                    | 2.949112968  |
| 212963_at    | HIS4                                                            | v-Ha-ras Harvey rat sarcoma viral oncogene homolog                                                                                                                                                                                                                           | 2.948633965  |
| 1558693_s_at | C1orf85                                                         | chromosome 1 open reading frame 85                                                                                                                                                                                                                                           | -2.948114079 |
| 211862_x_at  | CFLAR                                                           | CASP8 and FADD-like apoptosis regulator                                                                                                                                                                                                                                      | -2.946764362 |
| 216252_x_at  | FAS                                                             | Fas (TNF receptor superfamily, member 6)                                                                                                                                                                                                                                     | -2.938757764 |
| 221209_at    | PEG10                                                           | paternally expressed 10                                                                                                                                                                                                                                                      | 2.933868567  |
| 221671_x_at  | IGK@ /// IGKC                                                   | immunoglobulin kappa locus /// immunoglobulin kappa constant                                                                                                                                                                                                                 | -2.932626403 |
| 214736_s_at  | ADD1                                                            | adnectin 1 (alpha)                                                                                                                                                                                                                                                           | -2.929651314 |
| 214669_x_at  | IGKC                                                            | Immunoglobulin kappa constant                                                                                                                                                                                                                                                | -2.927015547 |
| 203836_s_at  | MAP3K5                                                          | mitogen-activated protein kinase kinase kinase 5                                                                                                                                                                                                                             | 2.922286246  |
| 201148_s_at  | TRIM14                                                          | triglycine motif-containing 14                                                                                                                                                                                                                                               | -2.921141157 |
| 201161_s_at  | CSDA                                                            | cold shock domain protein A                                                                                                                                                                                                                                                  | 2.916976045  |
| 210574_s_at  | NUDC                                                            | nuclear distribution gene C homolog (A. nidulans)                                                                                                                                                                                                                            | 2.909292651  |
| 226939_at    | CPEB2                                                           | cytoplasmic polyadenylation element binding protein 2                                                                                                                                                                                                                        | -2.907152005 |
| 214836_x_at  | IGK@ /// IGKC                                                   | immunoglobulin kappa locus /// immunoglobulin kappa constant                                                                                                                                                                                                                 | -2.905170436 |
| 219188_s_at  | MACROD1                                                         | MACRO domain containing 1                                                                                                                                                                                                                                                    | 2.901350968  |
| 212898_at    | KIAA0406                                                        | KIAA0406                                                                                                                                                                                                                                                                     | 2.900591878  |
| 201786_s_at  | ADAR                                                            | adenosine deaminase, RNA-specific                                                                                                                                                                                                                                            | -2.889216283 |
| 203837_at    | MAP3K5                                                          | mitogen-activated protein kinase kinase kinase 5                                                                                                                                                                                                                             | 2.888091572  |
| 208880_s_at  | PRPF6                                                           | PRPF6 pre-mRNA processing factor 6 homolog (S. cerevisiae)                                                                                                                                                                                                                   | 2.88324107   |
| 225756_at    | CSNK1E                                                          | casein kinase 1, epsilon                                                                                                                                                                                                                                                     | 2.880169676  |
| 212959_s_at  | GNPTAB                                                          | N-acetylglucosamine-1-phosphate transferase, alpha and beta subunits                                                                                                                                                                                                         | -2.876787133 |
| 1557095_s_at | LOC643837                                                       | hypothetical LOC643837                                                                                                                                                                                                                                                       | 2.873921214  |
| 1559739_at   | CHP11                                                           | Choline phosphotransferase 1                                                                                                                                                                                                                                                 | -2.872861784 |
| 219703_at    | MNS1                                                            | meiosis-specific nuclear structural 1                                                                                                                                                                                                                                        | 2.865966611  |
| 218858_at    | DEPDC6                                                          | DEP domain containing 6                                                                                                                                                                                                                                                      | -2.862195609 |
| 235289_at    | EIF5A2                                                          | eukaryotic translation initiation factor 5A2                                                                                                                                                                                                                                 | -2.856245642 |
| 241994_at    | XDH                                                             | xanthine dehydrogenase                                                                                                                                                                                                                                                       | -2.846247225 |
| 227815_at    | 227815_at                                                       | ---                                                                                                                                                                                                                                                                          | -2.845219902 |
| 225898_at    | WDR54                                                           | WD repeat domain 54                                                                                                                                                                                                                                                          | 2.841553028  |
| 1552486_s_at | LACTB                                                           | lactamase, beta                                                                                                                                                                                                                                                              | -2.840912916 |
| 212529_at    | LSM12                                                           | LSM12 homolog (S. cerevisiae)                                                                                                                                                                                                                                                | 2.831656975  |
| 201863_at    | FAM43A                                                          | family with sequence similarity 32, member A                                                                                                                                                                                                                                 | -2.829647981 |
| 219058_x_at  | TINAGL1                                                         | tubulointerstitial nephritis antigen-like 1                                                                                                                                                                                                                                  | 2.816826249  |
| 202305_s_at  | FEZ2                                                            | fasciculation and elongation protein zeta 2 (zyglin II)                                                                                                                                                                                                                      | -2.81495728  |
| 224478_s_at  | C7orf50                                                         | chromosome 7 open reading frame 50                                                                                                                                                                                                                                           | 2.81493166   |
| 213817_at    | IRAK3                                                           | interleukin-1 receptor-associated kinase 3                                                                                                                                                                                                                                   | -2.808574741 |
| 212252_at    | CAAMK2                                                          | calcium/calmodulin-dependent protein kinase kinase 2, beta                                                                                                                                                                                                                   | -2.804909251 |
| 210766_s_at  | CSE1L                                                           | CSE1 chromosome segregation 1-like (yeast)                                                                                                                                                                                                                                   | 2.799151824  |
| 219512_at    | DSN1                                                            | DSN1, MIND kinetochore complex component, homolog (S. cerevisiae)                                                                                                                                                                                                            | 2.794777702  |
| 222801_s_at  | STAG3L4                                                         | stromal antigen 3-like 4                                                                                                                                                                                                                                                     | 2.794769173  |
| 202309_at    | MTFHD1                                                          | methyltetrahydrofolate dehydrogenase (NADP+ dependent) 1, methyltetrahydrofolate cyclohydrolase, formyltetrahydrofolate synthetase                                                                                                                                           | 2.788321229  |
| 220688_s_at  | MRT04                                                           | mRNA turnover 4 homolog (S. cerevisiae)                                                                                                                                                                                                                                      | 2.779536794  |
| 223092_at    | ANKH                                                            | ankylosis, progressive homolog (mouse)                                                                                                                                                                                                                                       | -2.776177153 |
| 212407_at    | METTL13                                                         | methyltransferase like 13                                                                                                                                                                                                                                                    | -2.774619442 |
| 202288_at    | MYO9                                                            | mechanistic target of rapamycin (serine/threonine kinase)                                                                                                                                                                                                                    | 2.774427599  |
| 205234_at    | SLC16A4                                                         | solute carrier family 16, member 4 (monocarboxylic acid transporter 5)                                                                                                                                                                                                       | -2.771433441 |
| 218397_at    | FANCL                                                           | Fanconi anemia, complementation group L                                                                                                                                                                                                                                      | 2.771206873  |
| 201984_s_at  | EGFR                                                            | epidermal growth factor receptor (erythroblastic leukemia viral (v-erb-b) oncogene homolog, avian)                                                                                                                                                                           | 2.766671893  |
| 209538_at    | ZNF32                                                           | zinc finger protein 32                                                                                                                                                                                                                                                       | -2.765075242 |
| 235206_at    | ENTPD7                                                          | ectonucleoside triphosphate diphosphohydrolase 7                                                                                                                                                                                                                             | -2.763541681 |
| 204783_at    | MLF1                                                            | myeloid leukemia factor 1                                                                                                                                                                                                                                                    | 2.760493009  |
| 204137_at    | GPRI37B                                                         | G protein-coupled receptor 137B                                                                                                                                                                                                                                              | -2.758463209 |
| 218844_at    | ACS2                                                            | acyl-CoA synthetase family member 2                                                                                                                                                                                                                                          | 2.75408675   |
| 201173_x_at  | NUDC                                                            | nuclear distribution gene C homolog (A. nidulans)                                                                                                                                                                                                                            | 2.752889348  |
| 209499_x_at  | TNFSF12-TNFSF13 /// TNFSF13                                     | TNFSF12-TNFSF13 readthrough transcript /// tumor necrosis factor (ligand) superfamily, member 13                                                                                                                                                                             | -2.75241409  |
| 200779_at    | ATF4                                                            | activating transcription factor 4 (tax-responsive enhancer element B67)                                                                                                                                                                                                      | 2.752020106  |
| 222640_at    | DNMT3A                                                          | DNA (cytosine-5)-methyltransferase 3 alpha                                                                                                                                                                                                                                   | -2.736074743 |
| 219500_at    | CLCF1                                                           | cardiotrophin-like cytokine factor 1                                                                                                                                                                                                                                         | 2.731842485  |
| 64900_at     | FLJ22167                                                        | hypothetical protein FLJ22167                                                                                                                                                                                                                                                | 2.727950693  |
| 203277_at    | DFFA                                                            | DNA fragmentation factor, 45kDa, alpha polypeptide                                                                                                                                                                                                                           | 2.722754302  |
| 224903_at    | CIRH1A                                                          | cirrhosis, autosomal recessive 1A (cirhin)                                                                                                                                                                                                                                   | 2.722074397  |
| 207431_s_at  | DEGS1                                                           | degenerative spermatocyte homolog 1, lipid desaturase (Drosophila)                                                                                                                                                                                                           | -2.721150103 |
| 1552631_at   | POLR22                                                          | polymerase (RNA) II (DNA directed) polypeptide 22                                                                                                                                                                                                                            | -2.715933519 |
| 217714_x_at  | STMN1                                                           | stathmin 1                                                                                                                                                                                                                                                                   | 2.71125981   |
| 201891_s_at  | B2M                                                             | beta-2-microglobulin                                                                                                                                                                                                                                                         | -2.70981379  |
| 226585_at    | ENTPD1                                                          | ectonucleoside triphosphate diphosphohydrolase 1                                                                                                                                                                                                                             | -2.709231968 |
| 225699_at    | C2orf18                                                         | chromosome 2 open reading frame 18                                                                                                                                                                                                                                           | -2.706411819 |
| 205164_at    | GCAT                                                            | glycine C-acetyltransferase (2-amino-3-ketobutyrate coenzyme A ligase)                                                                                                                                                                                                       | 2.697485687  |
| 1553218_a_at | ZNF512                                                          | zinc finger protein 512                                                                                                                                                                                                                                                      | -2.696713109 |
| 203719_at    | ERCC1                                                           | excision repair cross-complementing rodent repair deficiency, complementation group 1 (includes overlapping antisense sequence)                                                                                                                                              | 2.694320536  |
| 230172_at    | IFIT2L1                                                         | interferon, alpha-inducible protein 27-like 1                                                                                                                                                                                                                                | 2.693740425  |
| 212921_at    | SMYD2                                                           | SET and MYND domain containing 2                                                                                                                                                                                                                                             | -2.691351978 |
| 239476_at    | 239476_at                                                       | ---                                                                                                                                                                                                                                                                          | -2.687387574 |
| 212503_s_at  | DIP2C                                                           | DIP2 disco-interacting protein 2 homolog C (Drosophila)                                                                                                                                                                                                                      | -2.68228034  |
| 225611_at    | MAST4                                                           | microtubule associated serine/threonine kinase family member 4                                                                                                                                                                                                               | -2.679265213 |
| 230204_at    | GIMAP2                                                          | GTPase, MAP family member 2                                                                                                                                                                                                                                                  | -2.678676852 |
| 225347_at    | ARL8A                                                           | ADP-ribosylation factor-like 8A                                                                                                                                                                                                                                              | -2.677766378 |
| 244347_at    | 244347_at                                                       | ---                                                                                                                                                                                                                                                                          | -2.677087277 |
| 229007_at    | LOC283788                                                       | FSHD region gene 1 pseudogene                                                                                                                                                                                                                                                | -2.67641636  |
| 203883_s_at  | RAB11FP2                                                        | RAB11 family interacting protein 2 (class I)                                                                                                                                                                                                                                 | -2.675007006 |
| 200661_s_at  | RPS24                                                           | ribosomal protein S24                                                                                                                                                                                                                                                        | -2.674114652 |
| 223907_s_at  | PINX1                                                           | PIN2-interacting protein 1                                                                                                                                                                                                                                                   | 2.672208564  |
| 223445_at    | DTNBP1                                                          | dytrobrevin binding protein 1                                                                                                                                                                                                                                                | -2.669107222 |
| 201964_at    | SETX                                                            | senatxin                                                                                                                                                                                                                                                                     | -2.668001622 |

|              |                                                                              |                                                                                                                                                                                                                    |              |
|--------------|------------------------------------------------------------------------------|--------------------------------------------------------------------------------------------------------------------------------------------------------------------------------------------------------------------|--------------|
| 227964_at    | FRMD8                                                                        | FERM domain containing 8                                                                                                                                                                                           | 2.66462622   |
| 204780_s_at  | FAS                                                                          | Fas (TNF receptor superfamily, member 6)                                                                                                                                                                           | -2.661662806 |
| 221780_s_at  | D01K27                                                                       | DEAD (Asp-Glu-Ala-Asp) box polypeptide 27                                                                                                                                                                          | 2.660044995  |
| 1569973_at   | SEPT13                                                                       | Septin 13                                                                                                                                                                                                          | 2.659520006  |
| 235349_at    | FAM82A1                                                                      | family with sequence similarity 82, member A1                                                                                                                                                                      | -2.657812664 |
| 230278_at    | Z30728.at                                                                    | ...                                                                                                                                                                                                                | -2.62757657  |
| 206445_s_at  | PRMT1                                                                        | protein arginine methyltransferase 1                                                                                                                                                                               | 2.655146463  |
| 226385_s_at  | C7orf50                                                                      | chromosome 7 open reading frame 30                                                                                                                                                                                 | 2.655216558  |
| 224961_at    | SCYL2                                                                        | SCY1-like 2 (S. cerevisiae)                                                                                                                                                                                        | -2.646773167 |
| 241484_x_at  | Z41484_x.at                                                                  | ...                                                                                                                                                                                                                | -2.63979638  |
| 201632_at    | EIF3B1                                                                       | eukaryotic translation initiation factor 2B, subunit 1 alpha, 26kDa                                                                                                                                                | -2.639186651 |
| 208936_at    | ATP1B3                                                                       | ATPase, Na+/K+ transporting, beta 3 polypeptide                                                                                                                                                                    | -2.635540119 |
| 226831_at    | SLC25A46                                                                     | Solute carrier family 25, member 46                                                                                                                                                                                | -2.63130412  |
| 203884_s_at  | RAB11FIP2                                                                    | RAB11 family interacting protein 2 (class I)                                                                                                                                                                       | -2.631140306 |
| 229240_at    | ZDHHC21                                                                      | Zinc finger, DHHC-type containing 21                                                                                                                                                                               | -2.62815868  |
| 215176_x_at  | LOC100291464                                                                 | similar to HCG26659                                                                                                                                                                                                | -2.625474662 |
| 225699_at    | C7orf40                                                                      | chromosome 7 open reading frame 40                                                                                                                                                                                 | 2.623572042  |
| 226943_at    | C12orf73                                                                     | chromosome 12 open reading frame 73                                                                                                                                                                                | -2.620978259 |
| 229664_at    | MAPK8                                                                        | mitogen-activated protein kinase 8                                                                                                                                                                                 | -2.617732041 |
| 200730_s_at  | PTP4A1                                                                       | protein tyrosine phosphatase type IVA, member 1                                                                                                                                                                    | 2.614726211  |
| 202340_at    | TOR1A                                                                        | torin family 1, member A (torin A)                                                                                                                                                                                 | -2.611851966 |
| 203720_s_at  | ERCC1                                                                        | excision repair cross-complementing rodent repair deficiency, complementation group 1 (includes overlapping antisense sequence)                                                                                    | 2.610191084  |
| 212599_at    | AUTS2                                                                        | autism susceptibility candidate 2                                                                                                                                                                                  | -2.603607794 |
| 220610_s_at  | LRRF1P2                                                                      | leucine rich repeat (in FU1) interacting protein 2                                                                                                                                                                 | 2.602179808  |
| 220523_s_at  | TMC41769                                                                     | transmembrane protein 1768                                                                                                                                                                                         | -2.601296414 |
| 212314_at    | KIAA0746                                                                     | KIAA0746 protein                                                                                                                                                                                                   | -2.599453709 |
| 209799_at    | PRKAA1                                                                       | protein kinase, AMP-activated, alpha 1 catalytic subunit                                                                                                                                                           | 2.598453519  |
| 205442_at    | MFA3P3                                                                       | microfibrillar-associated protein 3-like                                                                                                                                                                           | -2.596457985 |
| 240409_at    | Z04049.at                                                                    | ...                                                                                                                                                                                                                | ---          |
| 211988_at    | SMARCE1                                                                      | SMN1/SNF related, matrix associated, actin dependent regulator of chromatin, subfamily e, member 1                                                                                                                 | -2.59453412  |
| 223721_s_at  | DNAJC12                                                                      | DnaJ (Hsp40) homolog, subfamily C, member 12                                                                                                                                                                       | -2.589025272 |
| 225415_at    | DTX3L                                                                        | deltex 3-like (Drosophila)                                                                                                                                                                                         | 2.580913741  |
| 202913_at    | ARHGEP11                                                                     | Rho guanine nucleotide exchange factor (GEF) 11                                                                                                                                                                    | -2.580789584 |
| 211056_s_at  | SRB5A1                                                                       | steroid 5-alpha-reductase, alpha polypeptide 1 (3-oxo-5-alpha-steroid delta 4-dehydrogenase alpha 1)                                                                                                               | 2.580597653  |
| 225512_at    | ZBTB38                                                                       | zinc finger and BTB domain containing 38                                                                                                                                                                           | -2.57843774  |
| 226460_at    | FNIP2                                                                        | folliculin interacting protein 2                                                                                                                                                                                   | -2.576725693 |
| 228442_at    | LOC90110                                                                     | hypothetical protein LOC90110                                                                                                                                                                                      | -2.574231743 |
| 224730_at    | DCA47                                                                        | DOB1 and CUA4 associated factor 7                                                                                                                                                                                  | -2.571149169 |
| 217378_x_at  | LOC100130100 /// LOC100291464                                                | similar to HCG26659 /// similar to HCG26659                                                                                                                                                                        | -2.568068126 |
| 230364_at    | CHPT1                                                                        | choline phosphotransferase 1                                                                                                                                                                                       | -2.565607408 |
| 203828_s_at  | IL32                                                                         | interleukin 32                                                                                                                                                                                                     | -2.565472096 |
| 204124_at    | SLC34A2                                                                      | solute carrier family 34 (sodium phosphate), member 2                                                                                                                                                              | -2.564906961 |
| 216231_s_at  | B2M                                                                          | beta-2-microglobulin                                                                                                                                                                                               | -2.564641372 |
| 226068_at    | SYK                                                                          | spleen tyrosine kinase                                                                                                                                                                                             | -2.561917405 |
| 1553983_at   | DTYMK                                                                        | deoxythymidylate kinase (thymidylate kinase)                                                                                                                                                                       | 2.561027738  |
| 203979_at    | CY27A1                                                                       | cytochrome P450, family 27, subfamily A, polypeptide 1                                                                                                                                                             | -2.55778108  |
| 223446_s_at  | DTYBP1                                                                       | dystrobrevin binding protein 1                                                                                                                                                                                     | -2.55632016  |
| 210774_s_at  | NCOA4                                                                        | nuclear receptor coactivator 4                                                                                                                                                                                     | -2.552321325 |
| 202658_at    | PEX11B                                                                       | peroxisomal biogenesis factor 11 beta                                                                                                                                                                              | -2.552140711 |
| 227665_at    | Z27665.at                                                                    | ...                                                                                                                                                                                                                | ---          |
| 226787_at    | ZNF18                                                                        | zinc finger protein 18                                                                                                                                                                                             | -2.551329013 |
| 211676_s_at  | RNF114                                                                       | ring finger protein 114                                                                                                                                                                                            | -2.550579802 |
| 212614_at    | ARID5B                                                                       | AT rich interactive domain 5B (MRF1-like)                                                                                                                                                                          | 2.548606713  |
| 226668_at    | WDSUB1                                                                       | WD repeat, sterile alpha motif and U-box domain containing 1                                                                                                                                                       | -2.547339112 |
| 217022_s_at  | IGH@ /// IGH41 /// IGH24 /// LOC100126583                                    | immunoglobulin heavy locus /// immunoglobulin heavy constant alpha 1 /// immunoglobulin heavy constant alpha 2 (A2m marker) /// hypothetical LOC100126583                                                          | -2.546823847 |
| 208623_s_at  | E2F                                                                          | etin                                                                                                                                                                                                               | -2.54220719  |
| 230913_at    | Z30913.at                                                                    | ...                                                                                                                                                                                                                | 2.541137672  |
| 226910_at    | Z26910.at                                                                    | ...                                                                                                                                                                                                                | -2.537559277 |
| 214768_x_at  | FAM20B                                                                       | Family with sequence similarity 20, member B                                                                                                                                                                       | -2.535254901 |
| 211383_s_at  | WDK37                                                                        | WD repeat domain 37                                                                                                                                                                                                | -2.532075392 |
| 212429_s_at  | GTF3C2                                                                       | general transcription factor IIIC, polypeptide 2, beta 110kDa                                                                                                                                                      | -2.528405323 |
| 226194_at    | ZNF828                                                                       | zinc finger protein 828                                                                                                                                                                                            | -2.525636726 |
| 209434_s_at  | PPAT                                                                         | phosphoribosyl pyrophosphate amidotransferase                                                                                                                                                                      | -2.525321074 |
| 49077_at     | PPME1                                                                        | protein phosphatase methyltransferase 1                                                                                                                                                                            | 2.519671377  |
| 212311_at    | KIAA0746                                                                     | KIAA0746 protein                                                                                                                                                                                                   | 2.518210392  |
| 226102_at    | Z26102.at                                                                    | ...                                                                                                                                                                                                                | -2.517677151 |
| 228630_at    | ZNF84                                                                        | zinc finger protein 84                                                                                                                                                                                             | -2.515804111 |
| 212376_at    | EP400                                                                        | E1A binding protein p400                                                                                                                                                                                           | -2.514889504 |
| 221218_s_at  | TNK1                                                                         | thiamin pyrophosphokinase 1                                                                                                                                                                                        | -2.514633993 |
| 219336_s_at  | ASCC1                                                                        | activating signal cointegrator 1 complex subunit 1                                                                                                                                                                 | -2.514402389 |
| 215121_x_at  | IGL@ /// IGLV1-44                                                            | immunoglobulin lambda locus /// immunoglobulin lambda variable 1-44                                                                                                                                                | 2.514220242  |
| 216984_x_at  | IGL@ /// IGLV2-18 /// IGLV2-23 /// LOC100293440                              | immunoglobulin lambda locus /// immunoglobulin lambda variable 2-18 /// immunoglobulin lambda variable 2-23 /// similar to ig lambda chain                                                                         | -2.513479696 |
| 221246_x_at  | TNS1                                                                         | tensin 1                                                                                                                                                                                                           | -2.510073388 |
| 200991_s_at  | SNR17                                                                        | sorting nexin 17                                                                                                                                                                                                   | 2.508515518  |
| 223888_s_at  | LARS                                                                         | leucyl-tRNA synthetase                                                                                                                                                                                             | -2.505048881 |
| 212323_s_at  | VPS13D                                                                       | vacuolar protein sorting 13 homolog D (S. cerevisiae)                                                                                                                                                              | 2.504325511  |
| 226158_at    | KHJ24                                                                        | kech-like 24 (Drosophila)                                                                                                                                                                                          | 2.502736034  |
| 201155_s_at  | MFA2                                                                         | mitofusin 2                                                                                                                                                                                                        | -2.502002029 |
| 216401_x_at  | LOC652493 /// LOC652694                                                      | similar to Ig kappa chain V-I region HK102 precursor /// similar to Ig kappa chain V-I region HK102 precursor                                                                                                      | 2.500245582  |
| 219291_at    | DTWD1                                                                        | DTW domain containing 1                                                                                                                                                                                            | -2.498314699 |
| 203996_s_at  | IFIT5                                                                        | interferon-induced protein with tetratricopeptide repeats 5                                                                                                                                                        | 2.497159836  |
| 217753_s_at  | RPS26                                                                        | ribosomal protein S26                                                                                                                                                                                              | -2.495539549 |
| 223144_at    | TSPAN14                                                                      | tetraspanin 14                                                                                                                                                                                                     | -2.493308577 |
| 224915_x_at  | C20orf199                                                                    | chromosome 20 open reading frame 199                                                                                                                                                                               | -2.490188774 |
| 227766_at    | LIG4                                                                         | ligase IV, DNA, ATP-dependent                                                                                                                                                                                      | 2.49010924   |
| 234212_at    | FBX20                                                                        | F-box and leucine-rich repeat protein 20                                                                                                                                                                           | -2.489478335 |
| 236539_at    | PTP42                                                                        | protein tyrosine phosphatase, non-receptor type 22 (lymphoid)                                                                                                                                                      | -2.487376006 |
| 236404_at    | Z36404.at                                                                    | ...                                                                                                                                                                                                                | -2.486516063 |
| 229025_s_at  | IMMP1L                                                                       | IMP1 inner mitochondrial membrane peptidase-like (S. cerevisiae)                                                                                                                                                   | -2.486096284 |
| 1552622_s_at | LOC411259 /// POLR2J2                                                        | PM52 postmeiotic segregation increased 2 (S. cerevisiae)-like /// polymerase (RNA) II (DNA directed) polypeptide J2                                                                                                | 2.486062977  |
| 218481_at    | EXO5C5                                                                       | exosome component 5                                                                                                                                                                                                | -2.484846302 |
| 221500_s_at  | STX16                                                                        | syntaxin 16                                                                                                                                                                                                        | 2.484825988  |
| 205329_s_at  | SNX4                                                                         | sorting nexin 4                                                                                                                                                                                                    | -2.483751086 |
| 218150_at    | ARL5A                                                                        | ADP-ribosylation factor-like 5A                                                                                                                                                                                    | -2.481576051 |
| 213268_at    | CAMTA1                                                                       | calmodulin binding transcription activator 1                                                                                                                                                                       | -2.481109728 |
| 209786_at    | HMG64                                                                        | high mobility group nucleosomal binding domain 4                                                                                                                                                                   | -2.479969447 |
| 201737_s_at  | MAR6                                                                         | membrane-associated ring finger (C3HC4) 6                                                                                                                                                                          | 2.479517188  |
| 226844_at    | MOBK12B                                                                      | MOB1, Mps One Binder kinase activator-like 2B (yeast)                                                                                                                                                              | -2.478930904 |
| 218546_at    | C1orf115                                                                     | chromosome 1 open reading frame 115                                                                                                                                                                                | -2.477973903 |
| 225384_at    | DOCK7                                                                        | dedicator of cytokinesis 7                                                                                                                                                                                         | -2.477123508 |
| 155312_a_at  | TCN                                                                          | tandem C2 domains, nuclear                                                                                                                                                                                         | 2.475878811  |
| 239167_at    | Z39167.at                                                                    | ...                                                                                                                                                                                                                | -2.474981204 |
| 217499_x_at  | OR7E37P                                                                      | olfactory receptor, family 7, subfamily E, member 37 pseudogene                                                                                                                                                    | 2.474631916  |
| 238000_at    | Z38002.at                                                                    | ...                                                                                                                                                                                                                | -2.473688802 |
| 204610_s_at  | CCDC90B                                                                      | coiled-coil domain containing 85B                                                                                                                                                                                  | -2.471485224 |
| 215379_x_at  | IGL@ /// IGLV1-44                                                            | immunoglobulin lambda locus /// immunoglobulin lambda variable 1-44                                                                                                                                                | 2.471463944  |
| 1554473_at   | SRGAP1                                                                       | SLIT-ROBO Rho GTPase activating protein 1                                                                                                                                                                          | 2.470895387  |
| 214677_x_at  | IGL@                                                                         | immunoglobulin lambda locus                                                                                                                                                                                        | -2.470671187 |
| 202183_s_at  | RIF22                                                                        | kinesin family member 22                                                                                                                                                                                           | 2.469745083  |
| 225931_s_at  | RNF213                                                                       | ring finger protein 213                                                                                                                                                                                            | -2.469424993 |
| 209374_s_at  | IGHM                                                                         | immunoglobulin heavy constant mu                                                                                                                                                                                   | -2.467346474 |
| 221558_at    | LEF1                                                                         | lymphoid enhancer-binding factor 1                                                                                                                                                                                 | -2.46619939  |
| 212239_at    | PKR1                                                                         | phosphoinositide-3-kinase, regulatory subunit 1 (alpha)                                                                                                                                                            | -2.465679648 |
| 242335_at    | SLC25A37                                                                     | solute carrier family 25, member 37                                                                                                                                                                                | 2.464274845  |
| 211656_x_at  | HIA-DQB1 /// LOC100294318                                                    | major histocompatibility complex, class II, DQ beta 1 /// similar to major histocompatibility complex, class II, DQ beta 1                                                                                         | -2.460147643 |
| 1553304_at   | LSM14B                                                                       | LSM14B, SCDB homolog 8 (S. cerevisiae)                                                                                                                                                                             | 2.458551624  |
| 224517_at    | POLR2J4                                                                      | polymerase (RNA) II (DNA directed) polypeptide J4, pseudogene                                                                                                                                                      | -2.458180659 |
| 228273_at    | Z28273.at                                                                    | ...                                                                                                                                                                                                                | -2.45573482  |
| 223253_at    | EPOR1                                                                        | ependymin related protein 1 (zebrafish)                                                                                                                                                                            | -2.456399676 |
| 203920_at    | NR1H3                                                                        | nuclear receptor subfamily 1, group H, member 3                                                                                                                                                                    | -2.454241882 |
| 217732_s_at  | ITM2B                                                                        | integral membrane protein 2B                                                                                                                                                                                       | -2.452127425 |
| 212895_x_at  | TFPI                                                                         | tumor protein, translationally-controlled 1                                                                                                                                                                        | -2.447633132 |
| 201312_s_at  | SH3BGL                                                                       | SH3 domain binding glutamic acid-rich protein like                                                                                                                                                                 | -2.44568997  |
| 217480_x_at  | LOC100287723 /// LOC642424 /// LOC642838                                     | similar to Ig kappa chain /// similar to HCG1742442 /// similar to HCG1742442                                                                                                                                      | -2.442648036 |
| 223356_s_at  | MTIF3                                                                        | mitochondrial translational initiation factor 3                                                                                                                                                                    | -2.441670838 |
| 204000_at    | GNS5                                                                         | guanine nucleotide binding protein (G protein), beta 5                                                                                                                                                             | 2.441317631  |
| 218457_s_at  | DNMT3A                                                                       | DNA (cytosine-5-)methyltransferase 3 alpha                                                                                                                                                                         | -2.435020448 |
| 218659_at    | ASXL2                                                                        | additional sex combs like 2 (Drosophila)                                                                                                                                                                           | -2.434518082 |
| 214548_x_at  | GNAS                                                                         | GNAS complex locus                                                                                                                                                                                                 | 2.4322263    |
| 211644_x_at  | IGKC /// IGKV3-20 /// IGKV3D-13 /// IGKV3D-15 /// LOC100291682 /// LOC440871 | immunoglobulin kappa locus /// immunoglobulin kappa constant /// immunoglobulin kappa variable 3D-11 /// immunoglobulin kappa variable 3D-15 (gene/pseudogene) /// similar to HCG1686089 /// similar to HCG2043206 | -2.43198195  |
| 201425_at    | ALDH2                                                                        | aldehyde dehydrogenase 2 family (mitochondrial)                                                                                                                                                                    | -2.431621205 |
| 200733_s_at  | PTP4A1                                                                       | protein tyrosine phosphatase type IVA, member 1                                                                                                                                                                    | 2.430883635  |
| 52078_at     | TMEM222                                                                      | transmembrane protein 222                                                                                                                                                                                          | 2.429878609  |
| 201112_s_at  | CSE1L                                                                        | CSE1 chromosome segregation 1-like (yeast)                                                                                                                                                                         | -2.42987603  |
| 201057_at    | ARL1                                                                         | ADP-ribosylation factor-like 1                                                                                                                                                                                     | -2.429808772 |
| 219400_at    | CNTNAP1                                                                      | contactin associated protein 1                                                                                                                                                                                     | 2.427551769  |
| 227308_x_at  | LTBP3                                                                        | latent transforming growth factor beta binding protein 3                                                                                                                                                           | 2.426760719  |
| 239577_at    | Z39577.at                                                                    | ...                                                                                                                                                                                                                | -2.426095946 |
| 214777_at    | IGKV4-3                                                                      | immunoglobulin kappa variable 4-1                                                                                                                                                                                  | -2.42205337  |
| 239784_at    | Z39784.at                                                                    | ...                                                                                                                                                                                                                | 2.419772789  |
| 203504_s_at  | ABCA1                                                                        | ATP-binding cassette, sub-family A (ABCA1), member 1                                                                                                                                                               | -2.419570867 |
| 223594_at    | TMEM117                                                                      | transmembrane protein 117                                                                                                                                                                                          | -2.419509623 |
| 217850_at    | GNL3                                                                         | guanine nucleotide binding protein-like 3 (nucleolar)                                                                                                                                                              | 2.419380707  |
| 209049_s_at  | ZMIND8                                                                       | zinc finger, MYND-type containing 8                                                                                                                                                                                | 2.417932748  |

|              |                                                                             |                                                                                                                                                                                                                                                                        |              |
|--------------|-----------------------------------------------------------------------------|------------------------------------------------------------------------------------------------------------------------------------------------------------------------------------------------------------------------------------------------------------------------|--------------|
| 212307_s_at  | OGT                                                                         | O-linked N-acetylglucosamine (GlcNAc) transferase (UDP-N-acetylglucosamine:polypeptide-N-acetylglucosaminyl transferase)                                                                                                                                               | 2.41581772   |
| 203196_at    | ABCCL4                                                                      | ATP-binding cassette, sub-family C (CFTR/MRP), member 4                                                                                                                                                                                                                | -2.41461373  |
| 214599_at    | CGGBP1                                                                      | CGG triplet repeat binding protein 1                                                                                                                                                                                                                                   | -2.413196693 |
| 201493_s_at  | PUM2                                                                        | pumilio homolog 2 (Drosophila)                                                                                                                                                                                                                                         | -2.408932763 |
| 218220_at    | C12orf10                                                                    | chromosome 12 open reading frame 10                                                                                                                                                                                                                                    | 2.408577883  |
| 222484_s_at  | CXCL14                                                                      | chemokine (C-X-C motif) ligand 14                                                                                                                                                                                                                                      | -2.406724872 |
| 218583_s_at  | DCUN1D1                                                                     | DCN1, defective in cullin neddylation 1, domain containing 1 (S. cerevisiae)                                                                                                                                                                                           | -2.404889328 |
| 209138_x_at  | IGL@                                                                        | immunoglobulin lambda locus                                                                                                                                                                                                                                            | -2.404467288 |
| 238787_at    | DENN1B                                                                      | DENN/MADD domain containing 1B                                                                                                                                                                                                                                         | -2.400886761 |
| 226560_at    | Z26560_at                                                                   | ...                                                                                                                                                                                                                                                                    | -2.400159397 |
| 226227_x_at  | C20orf199                                                                   | chromosome 20 open reading frame 199                                                                                                                                                                                                                                   | 2.397995992  |
| 201313_s_at  | SH3BPGL                                                                     | SH3 domain binding glutamic acid-rich protein like                                                                                                                                                                                                                     | -2.3956817   |
| 210223_s_at  | MR1                                                                         | major histocompatibility complex, class I-related                                                                                                                                                                                                                      | -2.395416533 |
| 223093_at    | ANKH                                                                        | ankylosis, progressive homolog (mouse)                                                                                                                                                                                                                                 | -2.395372186 |
| 227341_at    | BEND7                                                                       | BEN domain containing 7                                                                                                                                                                                                                                                | -2.395059142 |
| 225234_at    | CR1                                                                         | Cas-Br-M (murine) ecotropic retroviral transforming sequence                                                                                                                                                                                                           | -2.393769651 |
| 1558385_at   | 1558385_at                                                                  | ...                                                                                                                                                                                                                                                                    | 2.390602264  |
| 203815_at    | GSTT1                                                                       | glutathione S-transferase theta 1                                                                                                                                                                                                                                      | -2.390247659 |
| 238337_s_at  | DNAIC21                                                                     | DnaI (Hsp40) homolog, subfamily C, member 21                                                                                                                                                                                                                           | 2.389921026  |
| 218315_s_at  | CD59AP1                                                                     | CDK5 regulatory subunit associated protein 1                                                                                                                                                                                                                           | 2.386549157  |
| 218440_at    | MCC1                                                                        | methylcrotonyl-Coenzyme A carboxylase 1 (alpha)                                                                                                                                                                                                                        | 2.385849419  |
| 239101_at    | ITCH                                                                        | itchy E3 ubiquitin protein ligase homolog (mouse)                                                                                                                                                                                                                      | 2.382575697  |
| 226438_at    | SNTB1                                                                       | syntrophin, beta 1 (dystrophin-associated protein A1, 59kDa, basic component 1)                                                                                                                                                                                        | -2.379522707 |
| 208611_s_at  | SPTAN1                                                                      | spectrin, alpha, non-erythrocytic 1 (alpha-fodrin)                                                                                                                                                                                                                     | -2.378743889 |
| 219008_at    | C2orf43                                                                     | chromosome 2 open reading frame 43                                                                                                                                                                                                                                     | -2.376566175 |
| 208649_s_at  | VCP                                                                         | valosin-containing protein                                                                                                                                                                                                                                             | -2.374332955 |
| 218589_at    | LPAR6                                                                       | lysophosphatidic acid receptor 6                                                                                                                                                                                                                                       | -2.374140934 |
| 219177_at    | BKDC2                                                                       | brix domain containing 2                                                                                                                                                                                                                                               | 2.372200635  |
| 212504_at    | DIP1C                                                                       | DIP2 disco-interacting protein 2 homolog C (Drosophila)                                                                                                                                                                                                                | -2.371008991 |
| 238970_at    | BCL2L15                                                                     | BCL2-like 15                                                                                                                                                                                                                                                           | -2.367808604 |
| 213016_at    | BBX                                                                         | bobby sox homolog (Drosophila)                                                                                                                                                                                                                                         | -2.366956449 |
| 239629_at    | CFLAR                                                                       | CASP8 and FADD-like apoptosis regulator                                                                                                                                                                                                                                | -2.36694549  |
| 201034_at    | AD03                                                                        | adducin 3 (gamma)                                                                                                                                                                                                                                                      | -2.365530874 |
| 212012_at    | NEOD4                                                                       | neural precursor cell expressed, developmentally down-regulated 4                                                                                                                                                                                                      | -2.363558462 |
| 221216_s_at  | SCMH1                                                                       | sex comb on midleg homolog 1 (Drosophila)                                                                                                                                                                                                                              | 2.362782955  |
| 215714_s_at  | SMARCA4                                                                     | SWI/SNF related, matrix associated, actin dependent regulator of chromatin, subfamily a, member 4                                                                                                                                                                      | -2.361993182 |
| 1560763_at   | 1560763_at                                                                  | ...                                                                                                                                                                                                                                                                    | -2.361591884 |
| 222369_at    | NAT11                                                                       | N-acetyltransferase 11 (GCN5-related, putative)                                                                                                                                                                                                                        | -2.35973723  |
| 207783_x_at  | HUWE1                                                                       | HECT, UBA and WWE domain containing 1                                                                                                                                                                                                                                  | -2.358524729 |
| 212273_x_at  | GNAS                                                                        | GNAS complex locus                                                                                                                                                                                                                                                     | 2.358491468  |
| 60815_at     | POLR24                                                                      | polymerase (RNA) II (DNA directed) polypeptide J4, pseudogene                                                                                                                                                                                                          | 2.358405381  |
| 1552703_at   | CAHD16                                                                      | caspase recruitment domain family, member 16                                                                                                                                                                                                                           | -2.356960604 |
| 225880_at    | Z25880_at                                                                   | ...                                                                                                                                                                                                                                                                    | -2.35215151  |
| 202076_at    | BIRC2                                                                       | baculoviral IAP repeat-containing 2                                                                                                                                                                                                                                    | -2.354034504 |
| 201177_s_at  | UBA2                                                                        | ubiquitin-like modifier activating enzyme 2                                                                                                                                                                                                                            | 2.353219584  |
| 212467_at    | DNAIC13                                                                     | DnaI (Hsp40) homolog, subfamily C, member 13                                                                                                                                                                                                                           | -2.347211753 |
| 217987_at    | ASPMO1                                                                      | asparagine synthetase domain containing 1                                                                                                                                                                                                                              | -2.346476173 |
| 238982_at    | DENR                                                                        | density-regulated protein                                                                                                                                                                                                                                              | -2.345750986 |
| 201998_at    | ST6GAL1                                                                     | ST6 beta-galactosidase alpha-2,6-sialyltransferase 1                                                                                                                                                                                                                   | -2.345147244 |
| 217673_x_at  | GNAS                                                                        | GNAS complex locus                                                                                                                                                                                                                                                     | 2.34323907   |
| 207713_s_at  | RBCX1                                                                       | RanBP-type and C3HC4-type zinc finger containing 1                                                                                                                                                                                                                     | 2.342371085  |
| 208696_at    | FBN1                                                                        | fructose 1,6-bisphosphatase 1                                                                                                                                                                                                                                          | -2.341800791 |
| 210782_x_at  | GRIN1                                                                       | glutamate receptor, ionotropic, N-methyl D-aspartate 1                                                                                                                                                                                                                 | 2.341503718  |
| 212506_at    | PICALM                                                                      | phosphatidylinositol binding clathrin assembly protein                                                                                                                                                                                                                 | -2.339774699 |
| 219684_at    | RTF4                                                                        | receptor (chemosensory) transporter protein 4                                                                                                                                                                                                                          | -2.339510992 |
| 200973_s_at  | TAX1BP1                                                                     | Tax1 (human T-cell leukemia virus type 1) binding protein 1                                                                                                                                                                                                            | 2.339483336  |
| 202709_at    | FMOD                                                                        | fibromodulin                                                                                                                                                                                                                                                           | -2.338038234 |
| 226909_at    | ZNF518B                                                                     | zinc finger protein 518B                                                                                                                                                                                                                                               | -2.335126451 |
| 208030_s_at  | ADD1                                                                        | adducin 1 (alpha)                                                                                                                                                                                                                                                      | -2.334881104 |
| 209475_at    | USP15                                                                       | ubiquitin specific peptidase 15                                                                                                                                                                                                                                        | -2.33483233  |
| 229255_s_at  | AUP1                                                                        | ancient ubiquitous protein 1                                                                                                                                                                                                                                           | 2.333403338  |
| 225312_at    | COMMD6                                                                      | COMM domain containing 6                                                                                                                                                                                                                                               | -2.332787068 |
| 203043_at    | ZBED1                                                                       | zinc finger, BED-type containing 1                                                                                                                                                                                                                                     | -2.332637918 |
| 224209_s_at  | GDA                                                                         | guanine deaminase                                                                                                                                                                                                                                                      | -2.332589414 |
| 227426_at    | SOS1                                                                        | son of sevenless homolog 1 (Drosophila)                                                                                                                                                                                                                                | -2.331200311 |
| 223494_at    | MGEA5                                                                       | meningioma expressed antigen 5 (hyaluronidase)                                                                                                                                                                                                                         | -2.331054547 |
| 224481_s_at  | HECTD1                                                                      | HECT domain containing 1                                                                                                                                                                                                                                               | 2.329909488  |
| 201607_at    | PWP1                                                                        | PWP1 homolog (S. cerevisiae)                                                                                                                                                                                                                                           | -2.328845184 |
| 228411_at    | PAR3DB                                                                      | par-3 partitioning defective 3 homolog B (C. elegans)                                                                                                                                                                                                                  | -2.325481306 |
| 200617_at    | MLEC                                                                        | mlectin                                                                                                                                                                                                                                                                | -2.325205989 |
| 221539_at    | EIF4EBP1                                                                    | eukaryotic translation initiation factor 4E binding protein 1                                                                                                                                                                                                          | 2.324176221  |
| 218345_at    | TMEM176A                                                                    | transmembrane protein 176A                                                                                                                                                                                                                                             | -2.323506773 |
| 214005_at    | GGCX                                                                        | gamma-glutamyl carboxylase                                                                                                                                                                                                                                             | 2.323480148  |
| 214201_x_at  | IGKC /// IGKV1-5 /// LOC100291464 /// LOC650405 /// LOC625493 /// LOC652694 | immunoglobulin kappa constant /// immunoglobulin kappa variable 1-5 /// similar to hCG26659 /// similar to Ig kappa chain V-1 region HK102 precursor /// similar to Ig kappa chain V-1 region HK102 precursor /// similar to Ig kappa chain V-1 region HK102 precursor | -2.323160873 |
| 235028_at    | Z35028_at                                                                   | ...                                                                                                                                                                                                                                                                    | -2.322793226 |
| 220547_s_at  | FAM35A                                                                      | family with sequence similarity 35, member A                                                                                                                                                                                                                           | -2.322542093 |
| 201779_s_at  | RNF13                                                                       | ring finger protein 13                                                                                                                                                                                                                                                 | -2.322175423 |
| 204521_at    | C12orf04                                                                    | chromosome 12 open reading frame 24                                                                                                                                                                                                                                    | 2.319968613  |
| 205362_s_at  | PF0N4                                                                       | prefoldin subunit 4                                                                                                                                                                                                                                                    | 2.319869004  |
| 202109_at    | ARFIP2                                                                      | ADP-ribosylation factor interacting protein 2                                                                                                                                                                                                                          | 2.319210904  |
| 229943_at    | TRIM13                                                                      | tripartite motif-containing 13                                                                                                                                                                                                                                         | -2.319104233 |
| 1552703_s_at | CAHD16 /// CASP1                                                            | caspase recruitment domain family, member 16 /// caspase 1, apoptosis-related cysteine peptidase (interleukin 1, beta, convertase)                                                                                                                                     | -2.318889845 |
| 227040_at    | NHLK3                                                                       | NHL repeat containing 3                                                                                                                                                                                                                                                | -2.317612114 |
| 231895_at    | SASS6                                                                       | spindle assembly 6 homolog (C. elegans)                                                                                                                                                                                                                                | 2.31313958   |
| 204324_s_at  | GOLIM4                                                                      | golgi integral membrane protein 4                                                                                                                                                                                                                                      | -2.312814881 |
| 212807_s_at  | SORT1                                                                       | sortilin 1                                                                                                                                                                                                                                                             | -2.309154184 |
| 210580_x_at  | SULT1A1 /// SULT1A4                                                         | sulfotransferase family, cytosolic, 1A, phenol-preferring, member 3 /// sulfotransferase family, cytosolic, 1A, phenol-preferring, member 4                                                                                                                            | -2.30912715  |
| 221907_at    | TRMT61A                                                                     | tRNA methyltransferase G16 homolog A (S. cerevisiae)                                                                                                                                                                                                                   | 2.308732894  |
| 204142_at    | ENOSF1                                                                      | enolase superfamily member 1                                                                                                                                                                                                                                           | 2.306163552  |
| 227935_s_at  | PCGF5                                                                       | polycomb group ring finger 5                                                                                                                                                                                                                                           | -2.30444353  |
| 202115_s_at  | NOC2L                                                                       | nuclear complex associated 2 homolog (S. cerevisiae)                                                                                                                                                                                                                   | 2.303729017  |
| 219815_at    | GALST4                                                                      | galactose-3-O-sulfotransferase 4                                                                                                                                                                                                                                       | -2.303573935 |
| 235146_at    | TMCC3                                                                       | transmembrane and coiled-coil domain family 3                                                                                                                                                                                                                          | -2.303393336 |
| 202481_at    | DHRS3                                                                       | dehydrogenase/reductase (SDR family) member 3                                                                                                                                                                                                                          | 2.30176887   |
| 241727_x_at  | DHFR1L                                                                      | dihydrofolate reductase-like 1                                                                                                                                                                                                                                         | 2.298334243  |
| 209970_x_at  | CASP1                                                                       | caspase 1, apoptosis-related cysteine peptidase (interleukin 1, beta, convertase)                                                                                                                                                                                      | -2.29812106  |
| 212486_s_at  | FYN                                                                         | FYN oncogene related to SRC, FGR, YES                                                                                                                                                                                                                                  | -2.297621953 |
| 201368_at    | ZFP36L2                                                                     | zinc finger protein 36, C3H type-like 2                                                                                                                                                                                                                                | -2.296312723 |
| 228091_s_at  | CCU1                                                                        | cyclin 1                                                                                                                                                                                                                                                               | -2.294651117 |
| 200551_at    | SART1                                                                       | squamous cell carcinoma antigen recognized by T cells                                                                                                                                                                                                                  | 2.293481292  |
| 209249_s_at  | GHTM                                                                        | growth hormone inducible transmembrane protein                                                                                                                                                                                                                         | -2.291530373 |
| 210970_s_at  | IBTK                                                                        | inhibitor of Bruton agammaglobulinemia tyrosine kinase                                                                                                                                                                                                                 | 2.290777993  |
| 210075_at    | MAR2                                                                        | membrane-associated ring finger (C3HC4) 2                                                                                                                                                                                                                              | -2.290376676 |
| 209213_at    | CBR1                                                                        | carbonyl reductase 1                                                                                                                                                                                                                                                   | -2.29005952  |
| 201911_s_at  | FARP1                                                                       | FERM, rhoGEF (ARHGEF) and pleckstrin domain protein 1 (chondrocyte-derived)                                                                                                                                                                                            | -2.289727493 |
| 236072_at    | Z36072_at                                                                   | ...                                                                                                                                                                                                                                                                    | -2.289617307 |
| 229568_at    | MOBK12B                                                                     | MOB1, Mps One Binder kinase activator-like 2B (yeast)                                                                                                                                                                                                                  | -2.289225077 |
| 235266_at    | ATAD2                                                                       | ATPase family, AAA domain containing 2                                                                                                                                                                                                                                 | 2.288949497  |
| 244699_at    | AH1                                                                         | Abelson helper integration site 1                                                                                                                                                                                                                                      | 2.287811499  |
| 239449_at    | Z39449_at                                                                   | ...                                                                                                                                                                                                                                                                    | -2.286167309 |
| 212907_at    | SLC30A1                                                                     | Solute carrier family 30 (zinc transporter), member 1                                                                                                                                                                                                                  | -2.285751031 |
| 223331_s_at  | DDX20                                                                       | DEAD (Asp-Glu-Ala-Asp) box polypeptide 20                                                                                                                                                                                                                              | -2.285175339 |
| 212222_at    | PSME4                                                                       | proteasome (prosome, macropain) activator subunit 4                                                                                                                                                                                                                    | -2.285110952 |
| 209384_at    | PROSC                                                                       | proline synthetase co-transcribed homolog (bacterial)                                                                                                                                                                                                                  | 2.283989118  |
| 217157_x_at  | IGK@ /// IGKC /// LOC650405 /// LOC652694                                   | immunoglobulin kappa locus /// immunoglobulin kappa constant /// similar to Ig kappa chain V-1 region HK102 precursor /// similar to Ig kappa chain V-1 region HK102 precursor                                                                                         | -2.282665272 |
| 218119_at    | TMM23 /// TMM23B                                                            | translocase of inner mitochondrial membrane 23 homolog (yeast) /// translocase of inner mitochondrial membrane 23 homolog B (yeast)                                                                                                                                    | -2.281734769 |
| 202777_at    | SHO2                                                                        | soe-2 suppressor of clear homolog (C. elegans)                                                                                                                                                                                                                         | -2.281422937 |
| 211858_x_at  | GNAS                                                                        | GNAS complex locus                                                                                                                                                                                                                                                     | 2.280568778  |
| 217148_x_at  | LOC100293440                                                                | similar to Ig lambda chain                                                                                                                                                                                                                                             | -2.278767717 |
| 227021_at    | AOP1                                                                        | amine oxidase (flavin containing) domain 1                                                                                                                                                                                                                             | -2.278440587 |
| 204552_at    | INPP4A                                                                      | inositol polyphosphate 4-phosphatase, type 1, 107kDa                                                                                                                                                                                                                   | -2.277702069 |
| 202333_at    | BCKDHA                                                                      | branched chain keto acid dehydrogenase E1, alpha polypeptide                                                                                                                                                                                                           | 2.277492196  |
| 225163_at    | FRMD4A                                                                      | FERM domain containing 4A                                                                                                                                                                                                                                              | -2.275810789 |
| 218174_s_at  | C10orf57                                                                    | chromosome 10 open reading frame 57                                                                                                                                                                                                                                    | -2.275348711 |
| 201874_at    | MPZL1                                                                       | myelin protein zero-like 1                                                                                                                                                                                                                                             | -2.275067347 |
| 202579_x_at  | HMGNA                                                                       | high mobility group nucleosomal binding domain 4                                                                                                                                                                                                                       | -2.274700018 |
| 209981_x_at  | GNAS                                                                        | GNAS complex locus                                                                                                                                                                                                                                                     | 2.274382737  |
| 218847_at    | IGF2BP2                                                                     | insulin-like growth factor 2 mRNA binding protein 2                                                                                                                                                                                                                    | 2.274113886  |
| 225680_at    | LRWD1                                                                       | leucine-rich repeats and WD repeat domain containing 1                                                                                                                                                                                                                 | 2.272951386  |
| 208861_s_at  | CGGBP1                                                                      | CGG triplet repeat binding protein 1                                                                                                                                                                                                                                   | -2.272925252 |
| 233223_at    | Z33223_at                                                                   | ...                                                                                                                                                                                                                                                                    | -2.272183124 |
| 225050_at    | ZNF512                                                                      | zinc finger protein 512                                                                                                                                                                                                                                                | -2.271562819 |
| 202700_s_at  | TMEM63A                                                                     | transmembrane protein 63A                                                                                                                                                                                                                                              | 2.270011216  |
| 210314_x_at  | TNFSF13                                                                     | tumor necrosis factor (ligand) superfamily, member 13                                                                                                                                                                                                                  | -2.269824544 |
| 32137_at     | JAG2                                                                        | jagged 2                                                                                                                                                                                                                                                               | 2.269712391  |
| 219478_at    | WFDC1                                                                       | WAP four-disulfide core domain 1                                                                                                                                                                                                                                       | -2.267613381 |
| 228341_at    | Z28341_at                                                                   | ...                                                                                                                                                                                                                                                                    | -2.263355381 |
| 47530_at     | C9orf156                                                                    | chromosome 9 open reading frame 156                                                                                                                                                                                                                                    | -2.262943057 |
| 214273_x_at  | C16orf35                                                                    | chromosome 16 open reading frame 35                                                                                                                                                                                                                                    | 2.261640588  |
| 202271_s_at  | UNC119                                                                      | unc-119 homolog (C. elegans)                                                                                                                                                                                                                                           | -2.260697196 |
| 205765_at    | CYP3A5                                                                      | cytochrome P450, family 3, subfamily A, polypeptide 5                                                                                                                                                                                                                  | -2.260518811 |
| 226196_s_at  | C14orf179                                                                   | chromosome 14 open reading frame 179                                                                                                                                                                                                                                   | 2.259642403  |
| 200780_x_at  | GNAS                                                                        | GNAS complex locus                                                                                                                                                                                                                                                     | 2.259519525  |
| 213916_at    | ZNF20 /// ZNF625                                                            | zinc finger protein 20 /// zinc finger protein 625                                                                                                                                                                                                                     | -2.259306832 |



|              |                                                             |                                                                                                                                                                                                                                 |              |
|--------------|-------------------------------------------------------------|---------------------------------------------------------------------------------------------------------------------------------------------------------------------------------------------------------------------------------|--------------|
| 211628_x_at  | FTHP1                                                       | ferritin, heavy polypeptide pseudogene 1                                                                                                                                                                                        | -2.258239624 |
| 231850_x_at  | KIAA1712                                                    | KIAA1712                                                                                                                                                                                                                        | -2.257557133 |
| 225684_at    | SKA2                                                        | sginidie and kinetochore associated complex subunit 2                                                                                                                                                                           | 2.255496798  |
| 1554602_at   | RBMB8A                                                      | RNA binding motif protein 8A                                                                                                                                                                                                    | 2.254613972  |
| 211643_x_at  | IGKC /// IGKV3-20 /// IGKV3D-13 /// IGKV3D-15 /// LOC440871 | immunoglobulin kappa locus /// immunoglobulin kappa constant /// immunoglobulin kappa variable 3-20 /// immunoglobulin kappa variable 3D-11 /// immunoglobulin kappa variable 3D-15 (gene/pseudogene) /// similar to hCG2043206 | -2.254334124 |
| 51146_at     | PIGV                                                        | phosphatidylinositol glycan anchor biosynthesis, class V                                                                                                                                                                        | 2.253590726  |
| 238879_at    | Z38879_at                                                   | ---                                                                                                                                                                                                                             | -2.253000567 |
| 240636_at    | Z40636_at                                                   | ---                                                                                                                                                                                                                             | 2.252083233  |
| 226615_at    | XPR1                                                        | ---                                                                                                                                                                                                                             | 2.251382271  |
| 219622_at    | RAB20                                                       | xenotropic and polytropic retrovirus receptor                                                                                                                                                                                   | -2.249661879 |
| 204735_at    | PDE4A                                                       | RAB20, member RAS oncogene family                                                                                                                                                                                               | -2.249481355 |
| 201875_s_at  | MPZL1                                                       | phosphodiesterase 4A, cAMP-specific (phosphodiesterase E2 dunce homolog, Drosophila)                                                                                                                                            | -2.248996363 |
| 205965_at    | BATF                                                        | myelin protein zero-like 1                                                                                                                                                                                                      | -2.247345275 |
| 221253_s_at  | TXNDC5                                                      | basic leucine zipper transcription factor, ATF-like                                                                                                                                                                             | -2.246696112 |
| 1554082_a_at | NOL9                                                        | thioredoxin domain containing 5 (endoplasmic reticulum)                                                                                                                                                                         | 2.246498753  |
| 203829_at    | ELP4                                                        | nucleolar protein 9                                                                                                                                                                                                             | 2.243923649  |
| 227576_at    | Z27576_at                                                   | elongation protein 4 homolog (S. cerevisiae)                                                                                                                                                                                    | -2.243853337 |
| 213795_s_at  | PTPRA                                                       | ---                                                                                                                                                                                                                             | 2.243631307  |
| 202887_s_at  | DDIT4                                                       | protein tyrosine phosphatase, receptor type, A                                                                                                                                                                                  | 2.242241934  |
| 202137_s_at  | ZMYND11                                                     | DNA-damage-inducible transcript 4                                                                                                                                                                                               | -2.242072397 |
| 235296_at    | EIF5A2                                                      | zinc finger, MYND domain containing 11                                                                                                                                                                                          | -2.24146582  |
| 213037_x_at  | STAU1                                                       | eukaryotic translation initiation factor 5A2                                                                                                                                                                                    | 2.241217831  |
| 203559_s_at  | ABP1                                                        | staufen, RNA binding protein, homolog 1 (Drosophila)                                                                                                                                                                            | -2.238475283 |
| 211495_x_at  | TNFSF12-TNFSF13 /// TNFSF13                                 | amiloride binding protein 1 (amine oxidase (copper-containing))                                                                                                                                                                 | -2.238395505 |
| 210551_s_at  | SAT1                                                        | TNFSF12-TNFSF13 readthrough transcript /// tumor necrosis factor (ligand) superfamily, member 13                                                                                                                                | -2.237929368 |
| 224742_at    | ABHD12                                                      | spasmolysin/spermine N1 acetyltransferase 1                                                                                                                                                                                     | 2.236722247  |
| 226206_at    | MAFK                                                        | abhydrolase domain containing 12                                                                                                                                                                                                | 2.235514246  |
| 201252_at    | PSMC4                                                       | v-maf musculoaponeurotic fibrosarcoma oncogene homolog K (avian)                                                                                                                                                                | 2.232827971  |
| 208845_at    | VDAC3                                                       | proteasome (prosome, macropain) 26S subunit, ATPase, 4                                                                                                                                                                          | 2.231785936  |
| 237216_at    | Z37216_at                                                   | voltage-dependent anion channel 3                                                                                                                                                                                               | 2.231123478  |
| 209314_s_at  | HBS1L                                                       | ---                                                                                                                                                                                                                             | 2.22999769   |
| 228157_at    | ZNF207                                                      | HBS1-like (S. cerevisiae)                                                                                                                                                                                                       | -2.22743726  |
| 223024_at    | AP1M3                                                       | zinc finger protein 207                                                                                                                                                                                                         | -2.227215411 |
| 204115_s_at  | ADK                                                         | adaptor-related protein complex 1, mu 1 subunit                                                                                                                                                                                 | 2.226963084  |
| 223361_at    | C5orf115                                                    | adenosine kinase                                                                                                                                                                                                                | -2.226914559 |
| 238988_at    | Z38988_at                                                   | chromosome 6 open reading frame 115                                                                                                                                                                                             | 2.226694744  |
| 219303_at    | RNF219                                                      | ---                                                                                                                                                                                                                             | -2.225823427 |
| 201978_s_at  | KIAA0141                                                    | ring finger protein 219                                                                                                                                                                                                         | 2.225371126  |
| 217610_at    | Z17610_at                                                   | KIAA0141                                                                                                                                                                                                                        | -2.225287109 |
| 1554821_a_at | ZBED1                                                       | ---                                                                                                                                                                                                                             | -2.224731308 |
| 203505_at    | ABCA1                                                       | zinc finger, BED-type containing 1                                                                                                                                                                                              | -2.22444275  |
| 209655_at    | XKCC1                                                       | ATP-binding cassette, sub-family A (ABC1), member 1                                                                                                                                                                             | 2.22395388   |
| 221274_s_at  | LMAN2L                                                      | X-ray repair complementing defective repair in Chinese hamster cells 1                                                                                                                                                          | 2.222549336  |
| 225826_at    | MMA8                                                        | lectin, mannose-binding 2-like                                                                                                                                                                                                  | 2.2198743    |
| 209748_at    | SPAST                                                       | methylmalonic aciduria (cobalamin deficiency) cblB type                                                                                                                                                                         | -2.21759169  |
| 226296_at    | RUNDG1                                                      | spastin                                                                                                                                                                                                                         | 2.216355022  |
| 225049_at    | BLDC1S2                                                     | RUN domain containing 1                                                                                                                                                                                                         | -2.214853364 |
| 205945_at    | IL6R                                                        | biogenesis of lysosomal organelles complex 1, subunit 2                                                                                                                                                                         | -2.21470249  |
| 211379_x_at  | B3GALNT1                                                    | interleukin 6 receptor                                                                                                                                                                                                          | -2.212846007 |
| 205406_s_at  | SPA17                                                       | beta-1,3-N-acetylgalactosaminyltransferase 1 (globoside blood group)                                                                                                                                                            | 2.211675545  |
| 212420_at    | ELF1                                                        | sperm autoantigenic protein 17                                                                                                                                                                                                  | -2.210899715 |
| 205002_at    | AHD1C1                                                      | E74-like factor 1 (ets domain transcription factor)                                                                                                                                                                             | 2.210667854  |
| 217983_s_at  | RNASET2                                                     | AT hook, DNA binding motif, containing 1                                                                                                                                                                                        | -2.208810972 |
| 216092_s_at  | SLC7A8                                                      | ribonuclease T2                                                                                                                                                                                                                 | -2.208710881 |
| 209493_at    | PDZD2                                                       | solute carrier family 7 (cationic amino acid transporter, y+ system), member 8                                                                                                                                                  | 2.207971699  |
| 226293_at    | MEI19                                                       | PDZ domain containing 2                                                                                                                                                                                                         | 2.207458015  |
| 218339_at    | MRPL22                                                      | mediator complex subunit 19                                                                                                                                                                                                     | 2.207104095  |
| 207122_x_at  | SULT1A2                                                     | mitochondrial ribosomal protein L22                                                                                                                                                                                             | -2.206735497 |
| 205060_at    | PARG                                                        | sulfotransferase family, cytosolic, 1A, phenol-preferring, member 2                                                                                                                                                             | -2.206040724 |
| 222698_s_at  | IMPACT                                                      | poly (ADP-ribose) glycohydrolase                                                                                                                                                                                                | -2.205458399 |
| 226288_s_at  | NLGN2                                                       | Impact homolog (mouse)                                                                                                                                                                                                          | 2.204271559  |
| 222696_at    | AXIN2                                                       | neurotigin 2                                                                                                                                                                                                                    | -2.203307594 |
| 204363_at    | F3                                                          | axin 2                                                                                                                                                                                                                          | 2.202758     |
| 224904_at    | PDPR                                                        | coagulation factor III (thromboplastin, tissue factor)                                                                                                                                                                          | -2.20220043  |
| 213594_x_at  | FUSP1                                                       | pyruvate dehydrogenase phosphatase regulatory subunit                                                                                                                                                                           | 2.201300488  |
| 214157_at    | GNAS                                                        | FUS interacting protein (serine/arginine-rich) 1                                                                                                                                                                                | 2.199787562  |
| 202136_at    | ZMYND11                                                     | GNAS complex locus                                                                                                                                                                                                              | -2.199777277 |
| 44673_at     | SIGLEC1                                                     | zinc finger, MYND domain containing 11                                                                                                                                                                                          | -2.199582886 |
| 224522_s_at  | DCAKD                                                       | sialic acid binding Ig-like lectin 1, sialoadhesin                                                                                                                                                                              | 2.199561972  |
| 218976_at    | DNAJC12                                                     | dephospho-CoA kinase domain containing                                                                                                                                                                                          | 2.199402667  |
| 219235_s_at  | PHACTR4                                                     | Dnal (Hsp40) homolog, subfamily C, member 12                                                                                                                                                                                    | 2.199337417  |
|              |                                                             | phosphatase and actin regulator 4                                                                                                                                                                                               |              |
