# Supplementary material
Source: PubMed Central journal article supplement (PMC3816537)
Supplement: NIHMS520763-supplement-supp_data_6.pdf [file NIHMS520763-supplement-supp_data_6.pdf]

## Supplemental Table 5

| symbol   | chr | gene.cox | CNA       | miR#                                         | composite score |
|----------|-----|----------|-----------|----------------------------------------------|-----------------|
| ENTPD1   | 10  | down     | deleted   | hsa-miR-584                                  | 9.32            |
| PTPRA    | 20  | up       | amplified | hsa-miR-541                                  | 9.29            |
| BLCAP    | 20  | up       | amplified | hsa-miR-520d-3p                              | 9.10            |
| UQCC     | 20  | up       | amplified |                                              | 9.09            |
| SHOC2    | 10  | down     | deleted   |                                              | 9.02            |
| ZNF337   | 20  | up       | amplified | hsa-miR-545*                                 | 9.00            |
| SLC25A22 | 11  | up       | amplified | hsa-miR-142-3p/mmu-miR-142-3p/rno-miR-142-3p | 8.95            |
| EIF6     | 20  | up       | amplified |                                              | 8.81            |
| ARFGAP1  | 20  | up       | amplified | hsa-miR-541                                  | 8.76            |
| SPAG4    | 20  | up       | amplified |                                              | 8.74            |
| THAP7    | 22  | up       | amplified |                                              | 8.58            |
| KIAA1432 | 9   | down     | deleted   | hsa-miR-576-5p                               | 8.53            |
| EPB41L1  | 20  | up       | amplified | hsa-miR-507                                  | 8.50            |
| PDDC1    | 11  | up       | amplified | hsa-miR-520d-3p                              | 8.50            |
| ZBTB20   | 3   | down     | deleted   |                                              | 8.47            |
| TCTN3    | 10  | down     | deleted   | hsa-miR-647                                  | 8.45            |
| EXOSC3   | 9   | down     | deleted   |                                              | 8.44            |
| KIAA1219 | 20  | up       | amplified | hsa-miR-507                                  | 8.24            |
| C7orf11  | 7   | up       | amplified |                                              | 8.23            |
| ABR      | 17  | down     | deleted   | hsa-miR-892b                                 | 8.20            |
| SRC      | 20  | up       | amplified |                                              | 8.16            |
| HKR1     | 19  | up       | amplified |                                              | 8.03            |
| JUNB     | 19  | up       | amplified | hsa-miR-520d-3p                              | 8.02            |
| POLR2L   | 11  | up       | amplified |                                              | 7.96            |
| ZNF680   | 7   | up       | amplified | hsa-miR-524-5p                               | 7.78            |
| SERGEF   | 11  | up       | amplified |                                              | 7.65            |
| PRDX2    | 19  | up       | amplified | hsa-miR-892a                                 | 7.62            |
| LZTR1    | 22  | up       | amplified |                                              | 7.50            |
| EFCAB4A  | 11  | up       | amplified |                                              | 7.47            |

|          |    |      |           |                                              |      |
|----------|----|------|-----------|----------------------------------------------|------|
| CD163    | 12 | down | deleted   |                                              | 7.42 |
| PDCD4    | 10 | down | deleted   |                                              | 7.37 |
| CD151    | 11 | up   | amplified |                                              | 7.37 |
| TNPO2    | 19 | up   | amplified | hsa-miR-548b-3p                              | 7.31 |
| CDC2L5   | 7  | up   | amplified |                                              | 7.28 |
| VPS41    | 7  | up   | amplified | hsa-miR-769-3p                               | 7.28 |
| EXOSC5   | 19 | up   | normal    | hsa-miR-9/mmu-miR-9/rno-miR-9                | 7.23 |
| CHID1    | 11 | up   | amplified |                                              | 7.22 |
| DEGS1    | 1  | down | normal    | hsa-miR-381/mmu-miR-381/rno-miR-381          | 7.21 |
| SETX     | 9  | down | normal    | hsa-miR-488                                  | 7.20 |
| TRIM14   | 9  | down | normal    | hsa-miR-938                                  | 7.18 |
| FLJ22167 | 16 | up   | normal    | hsa-miR-520d-3p                              | 7.18 |
| SMARCE1  | 17 | down | normal    | hsa-miR-381/mmu-miR-381/rno-miR-381          | 7.18 |
| GCAT     | 22 | up   | normal    | hsa-miR-9/mmu-miR-9/rno-miR-9                | 7.18 |
| ARID5B   | 10 | down | normal    | hsa-miR-584                                  | 7.17 |
| TIMM23   | 10 | down | normal    | hsa-miR-1275                                 | 7.16 |
| ITM2B    | 13 | down | normal    | hsa-miR-877/mmu-miR-877/rno-miR-877          | 7.16 |
| INPP4A   | 2  | down | normal    | hsa-miR-877/mmu-miR-877/rno-miR-877          | 7.16 |
| CFLAR    | 2  | down | normal    | hsa-miR-516a-5p                              | 7.16 |
| MPZL1    | 1  | down | normal    | hsa-miR-892b                                 | 7.15 |
| HMGCL    | 1  | up   | normal    | hsa-miR-9/mmu-miR-9/rno-miR-9                | 7.15 |
| CSDA     | 12 | up   | normal    | hsa-miR-9/mmu-miR-9/rno-miR-9                | 7.15 |
| LARS     | 5  | up   | normal    | hsa-miR-520d-3p                              | 7.15 |
| NEO1     | 15 | down | normal    | hsa-miR-892b                                 | 7.15 |
| RNF213   | 17 | down | normal    | hsa-miR-542-5p/mmu-miR-542-5p/rno-miR-542-5p | 7.14 |

|          |    |      |           |                                                 |      |
|----------|----|------|-----------|-------------------------------------------------|------|
| ZNF512   | 2  | down | normal    | hsa-miR-488                                     | 7.14 |
| NEDD4    | 15 | down | normal    | hsa-miR-381/mmu-miR-381/rno-miR-381             | 7.14 |
| PAK2     | 3  | down | normal    | hsa-miR-125a-3p/mmu-miR-125a-3p/rno-miR-125a-3p | 7.13 |
| DDX27    | 20 | up   | normal    | hsa-miR-520d-3p                                 | 7.13 |
| FAM32A   | 19 | down | normal    | hsa-miR-1296                                    | 7.13 |
| NUDC     | 1  | up   | normal    | hsa-miR-378*/mmu-miR-378*/rno-miR-378*          | 7.13 |
| POLR2C   | 16 | up   | normal    | hsa-miR-541                                     | 7.13 |
| TPK1     | 7  | down | normal    | hsa-miR-1275                                    | 7.13 |
| CSTF2T   | 10 | down | normal    | hsa-miR-381/mmu-miR-381/rno-miR-381             | 7.12 |
| ASXL2    | 2  | down | normal    | hsa-miR-381/mmu-miR-381/rno-miR-381             | 7.12 |
| SART1    | 11 | up   | normal    | hsa-miR-520d-3p                                 | 7.12 |
| C13orf31 | 13 | down | normal    | hsa-miR-381/mmu-miR-381/rno-miR-381             | 7.12 |
| PPAT     | 4  | up   | normal    | hsa-miR-9/mmu-miR-9/rno-miR-9                   | 7.12 |
| TRIM13   | 13 | down | normal    | hsa-miR-877/mmu-miR-877/rno-miR-877             | 7.11 |
| CBL      | 11 | down | normal    | hsa-miR-125a-3p/mmu-miR-125a-3p/rno-miR-125a-3p | 7.11 |
| USP15    | 12 | down | normal    | hsa-miR-584                                     | 7.11 |
| TSPAN14  | 10 | down | normal    | hsa-miR-892b                                    | 7.11 |
| March6   | 5  | up   | normal    | hsa-miR-942                                     | 7.10 |
| ZNF518B  | 4  | down | normal    | hsa-miR-516a-5p                                 | 7.10 |
| DTX3L    | 3  | down | normal    | hsa-miR-892b                                    | 7.10 |
| PPCDC    | 15 | up   | normal    | hsa-miR-146b-5p/mmu-miR-146b/rno-miR-146b       | 7.10 |
| ZBTB38   | 3  | down | normal    | hsa-miR-381/mmu-miR-381/rno-miR-381             | 7.10 |
| CRKL     | 22 | up   | amplified |                                                 | 7.10 |

|          |    |      |        |                                        |      |
|----------|----|------|--------|----------------------------------------|------|
| GSTT1    | 22 | down | normal | hsa-miR-551a                           | 7.10 |
| HMGN4    | 6  | down | normal | hsa-miR-938                            | 7.10 |
| KPNA3    | 13 | down | normal | hsa-miR-381/mmu-miR-381/rno-miR-381    | 7.09 |
| ADAR     | 1  | down | normal | hsa-miR-874/mmu-miR-874/rno-miR-874    | 7.09 |
| CCDC50   | 3  | down | normal | hsa-miR-584                            | 7.09 |
| ABCA1    | 9  | down | normal | hsa-miR-647                            | 7.09 |
| CSNK1E   | 22 | up   | normal | hsa-miR-541                            | 7.09 |
| CGGBP1   | 3  | down | normal | hsa-miR-1296                           | 7.09 |
| TC2N     | 14 | up   | normal | hsa-miR-146a/mmu-miR-146a/rno-miR-146a | 7.09 |
| PPME1    | 11 | up   | normal | hsa-miR-450b-3p                        | 7.08 |
| ZBTB34   | 9  | down | normal | hsa-miR-216a/mmu-miR-216a/rno-miR-216a | 7.08 |
| SRGAP1   | 12 | up   | normal | hsa-miR-507                            | 7.08 |
| FAM160B1 | 10 | down | normal | hsa-miR-381/mmu-miR-381/rno-miR-381    | 7.08 |
| PIK3R1   | 5  | down | normal | hsa-miR-519d                           | 7.07 |
| DTNBP1   | 6  | down | normal | hsa-miR-488                            | 7.07 |
| C2orf43  | 2  | down | normal | hsa-miR-892b                           | 7.07 |
| TNS1     | 2  | up   | normal | hsa-miR-544                            | 7.07 |
| SLC25A46 | 5  | down | normal | hsa-miR-510                            | 7.07 |
| FAF1     | 1  | up   | normal | hsa-miR-9/mmu-miR-9/rno-miR-9          | 7.07 |
| FAS      | 10 | down | normal | hsa-miR-1272                           | 7.07 |
| PSAT1    | 9  | up   | normal | hsa-miR-302c/mmu-miR-302c              | 7.07 |
| TMCC3    | 12 | down | normal | hsa-miR-584                            | 7.06 |
| PSME4    | 2  | down | normal | hsa-miR-892b                           | 7.06 |
| VPS13D   | 1  | up   | normal | hsa-miR-646                            | 7.06 |
| NCOA4    | 10 | down | normal | hsa-miR-551a                           | 7.06 |
| ARL5A    | 2  | down | normal | hsa-miR-381/mmu-miR-381/rno-miR-381    | 7.06 |

|         |    |      |        |                                           |      |
|---------|----|------|--------|-------------------------------------------|------|
| ASNSD1  | 2  | down | normal | hsa-miR-381/mmu-miR-381/rno-miR-381       | 7.06 |
| EPDR1   | 7  | down | normal | hsa-miR-1296                              | 7.06 |
| GNAS    | 20 | up   | normal | hsa-miR-541                               | 7.06 |
| DNAJC12 | 10 | up   | normal | hsa-miR-146b-5p/mmu-miR-146b/rno-miR-146b | 7.06 |
| SH3BGRL | 23 | down | normal | hsa-miR-874/mmu-miR-874/rno-miR-874       | 7.06 |
| STMN1   | 1  | up   | normal | hsa-miR-450b-3p                           | 7.06 |
| XDH     | 2  | down | normal | hsa-miR-216a/mmu-miR-216a/rno-miR-216a    | 7.05 |
| LACTB   | 15 | down | normal | hsa-miR-877/mmu-miR-877/rno-miR-877       | 7.05 |
| HECTD1  | 14 | up   | normal | hsa-miR-558                               | 7.05 |
| ATPBD4  | 15 | up   | normal | hsa-miR-544                               | 7.05 |
| SNX17   | 2  | down | normal | hsa-miR-938                               | 7.05 |
| BLOC1S2 | 10 | down | normal | hsa-miR-1272                              | 7.05 |
| GHITM   | 10 | down | normal | hsa-miR-1272                              | 7.05 |
| SLC16A4 | 1  | down | normal | hsa-miR-584                               | 7.05 |
| FEZ2    | 2  | down | normal | hsa-miR-381/mmu-miR-381/rno-miR-381       | 7.05 |
| CPEB2   | 4  | down | normal | hsa-miR-381/mmu-miR-381/rno-miR-381       | 7.05 |
| LAP3    | 4  | down | normal | hsa-miR-516a-5p                           | 7.05 |
| IPO7    | 11 | up   | normal | hsa-miR-520d-3p                           | 7.05 |
| ZNF828  | 13 | down | normal | hsa-miR-381/mmu-miR-381/rno-miR-381       | 7.04 |
| CLCF1   | 11 | up   | normal | hsa-miR-558                               | 7.04 |
| FMOD    | 1  | down | normal | hsa-miR-584                               | 7.04 |
| ATP2A2  | 12 | down | normal | hsa-miR-381/mmu-miR-381/rno-miR-381       | 7.04 |
| OSBPL11 | 3  | down | normal | hsa-miR-584                               | 7.04 |
| IGHM    | 14 | down | normal | hsa-miR-516a-5p                           | 7.04 |
| PEG10   | 7  | up   | normal | hsa-miR-641                               | 7.04 |

|           |    |      |        |                                                 |      |
|-----------|----|------|--------|-------------------------------------------------|------|
| SMCR8     | 17 | down | normal | hsa-miR-193b*                                   | 7.03 |
| SLC30A1   | 1  | down | normal | hsa-miR-892b                                    | 7.03 |
| IRAK3     | 12 | down | normal | hsa-miR-125a-3p/mmu-miR-125a-3p/rno-miR-125a-3p | 7.03 |
| USP47     | 11 | up   | normal | hsa-miR-146b-5p/mmu-miR-146b/rno-miR-146b       | 7.03 |
| TINAGL1   | 1  | up   | normal | hsa-miR-9/mmu-miR-9/rno-miR-9                   | 7.03 |
| PRKAA1    | 5  | up   | normal | hsa-miR-520d-3p                                 | 7.03 |
| BATF      | 14 | down | normal | hsa-miR-551a                                    | 7.03 |
| KPNA1     | 3  | down | normal | hsa-miR-584                                     | 7.03 |
| ABCC4     | 13 | down | normal | hsa-miR-381/mmu-miR-381/rno-miR-381             | 7.03 |
| ATP1B3    | 3  | down | normal | hsa-miR-892b                                    | 7.03 |
| C2orf18   | 2  | down | normal | hsa-miR-892b                                    | 7.03 |
| FAM20B    | 1  | down | normal | hsa-miR-125a-3p/mmu-miR-125a-3p/rno-miR-125a-3p | 7.03 |
| AUP1      | 2  | up   | normal | hsa-miR-146a/mmu-miR-146a/rno-miR-146a          | 7.03 |
| CBR1      | 21 | down | normal | hsa-miR-938                                     | 7.03 |
| MTHFD1    | 14 | up   | normal | hsa-miR-378*/mmu-miR-378*/rno-miR-378*          | 7.03 |
| PTPN22    | 1  | down | normal | hsa-miR-125a-3p/mmu-miR-125a-3p/rno-miR-125a-3p | 7.03 |
| NAT11     | 11 | up   | normal | hsa-miR-9/mmu-miR-9/rno-miR-9                   | 7.03 |
| TBC1D1    | 4  | down | normal | hsa-miR-516a-5p                                 | 7.03 |
| SPAST     | 2  | down | normal | hsa-miR-381/mmu-miR-381/rno-miR-381             | 7.03 |
| CLIC5     | 6  | down | normal | hsa-miR-184/mmu-miR-184/rno-miR-184             | 7.02 |
| RAB11FIP2 | 10 | down | normal | hsa-miR-381/mmu-miR-381/rno-miR-381             | 7.02 |

|           |    |      |        |                                                 |      |
|-----------|----|------|--------|-------------------------------------------------|------|
| IFIT5     | 10 | down | normal | hsa-miR-125a-3p/mmu-miR-125a-3p/rno-miR-125a-3p | 7.02 |
| LSM12     | 17 | up   | normal | hsa-miR-544                                     | 7.02 |
| KARS      | 16 | up   | normal | hsa-miR-891b                                    | 7.02 |
| DFFA      | 1  | up   | normal | hsa-miR-520d-3p                                 | 7.02 |
| CEP350    | 1  | down | normal | hsa-miR-488                                     | 7.01 |
| IQCK      | 16 | up   | normal | hsa-miR-646                                     | 7.01 |
| SS18      | 18 | down | normal | hsa-miR-488                                     | 7.01 |
| C20orf43  | 20 | up   | normal | hsa-miR-541                                     | 7.01 |
| EGFR      | 7  | up   | normal | hsa-miR-646                                     | 7.01 |
| TMEM63A   | 1  | up   | normal | hsa-miR-9/mmu-miR-9/rno-miR-9                   | 7.01 |
| ELF1      | 13 | down | normal | hsa-miR-938                                     | 7.01 |
| TTPAL     | 20 | up   | normal | hsa-miR-769-3p                                  | 7.01 |
| TMEM117   | 12 | down | normal | hsa-miR-381/mmu-miR-381/rno-miR-381             | 7.01 |
| CAMKK2    | 12 | down | normal | hsa-miR-184/mmu-miR-184/rno-miR-184             | 7.01 |
| C6orf115  | 6  | down | normal | hsa-miR-381/mmu-miR-381/rno-miR-381             | 7.01 |
| BBX       | 3  | down | normal | hsa-miR-488                                     | 7.01 |
| ATAD2     | 8  | up   | normal | hsa-miR-520d-3p                                 | 7.01 |
| EZR       | 6  | up   | normal | hsa-miR-450b-3p                                 | 7.00 |
| CAMSAP1L1 | 1  | down | normal | hsa-miR-488                                     | 7.00 |
| KIAA0406  | 20 | up   | normal | hsa-miR-34b*                                    | 7.00 |
| RNF4      | 4  | down | normal | hsa-miR-1272                                    | 7.00 |
| FAM82A1   | 2  | down | normal | hsa-miR-766                                     | 7.00 |

# miRNA whose expression is highly anti-concurrent with those of regulated genes
